# Supplementary material for: Obesity-induced endoplasmic reticulum stress causes chronic inflammation in adipose tissue
Source: PubMed Central journal article supplement — Sci Rep. 2012 Nov 12;2:799. doi: 10.1038/srep00799 (PMC3495279; doi:10.1038/srep00799), 2012-11-12
Supplement: srep00799-s1.pdf [file srep00799-s1.pdf]

## SUPPLEMENTARY INFORMATION

### **Obesity-induced endoplasmic reticulum stress causes chronic inflammation in adipose tissue**

**Noritaka Kawasaki, Rie Asada, Atsushi Saito, Soshi Kanemoto, & Kazunori Imaizumi\***

Department of Biochemistry, Institute of Biomedical & Health Science, University of Hiroshima, 1-2-3 Kasumi, Minami-ku, Hiroshima 734-8551, Japan

\* E-mail: imaizumi@hiroshima-u.ac.jp.

TABLE 1.  
Primer sets used for RT-PCR.

|              |     |                            |
|--------------|-----|----------------------------|
| <i>Atf4</i>  | Fwd | GGACAGATTGGATGTTGGAGAAAATG |
|              | Rev | GGAGATGGCCAATTGGGTTTCAC    |
| <i>Bip</i>   | Fwd | GTTTGCTGAGGAAGACAAAAAGCTC  |
|              | Rev | CACTTCCATAGAGTTTGCTGATAAT  |
| <i>Chop</i>  | Fwd | GTCCAGCTGGGAGCTGGAAG       |
|              | Rev | CTGACTGGAATCTGGAGAG        |
| <i>F4/80</i> | Fwd | CTTTGGCTATGGGCTTCCAGTC     |
|              | Rev | GCAAGGAGGACAGAGTTTATCGTG   |
| <i>Edem</i>  | Fwd | TGGGTTGGAAAGCAGAGTGGC      |
|              | Rev | TCCATTCCTACATGGAGGTAGAAGGG |
| <i>ERdj4</i> | Fwd | CCCCAGTGTCAAACCTGTACCAG    |
|              | Rev | AGCGTTTCCAATTTTCCATAAATT   |

|                                |     |                           |
|--------------------------------|-----|---------------------------|
| <i>Gapdh</i>                   | Fwd | AACTTTGGCATTGTGGAAGG      |
|                                | Rev | GGATGCAGGGATGATGTTCT      |
| <i>IFN-<math>\gamma</math></i> | Fwd | TCAAGTGGCATAGATGTGGAAGAA  |
|                                | Rev | TGGCTCTGCAGGATTTTCATG     |
| <i>Il-1<math>\beta</math></i>  | Fwd | AGGTCGCTCAGGGTCACAAG      |
|                                | Rev | GTGCTGCCTAATGTCCCCTTGAATC |
| <i>Il-6</i>                    | Fwd | GACAACTTTGGCATTGTGG       |
|                                | Rev | ATGCAGGGATGATGTTCTG       |
| <i>Mcp-1</i>                   | Fwd | CTGGATCGGAACCAAATGAG      |
|                                | Rev | CGGGTCAACTTCACATTCAA      |
| <i>Pdi</i>                     | Fwd | CAAGATCAAGCCCCACCTGAT     |
|                                | Rev | AGTTCGCCCCAACCAGTACTT     |
| <i>Tnf-<math>\alpha</math></i> | Fwd | CATCTTCTCAAATTCGAGTGACAA  |
|                                | Rev | TGGGAGTAGACAAGGTACAACCC   |
| <i>Xbp-1</i>                   | Fwd | ACACGCTTGGGAATGGACAC      |
|                                | Rev | CCATGGGAAGATGTTCTGGG      |
